# Supplementary material for: Sponge-Derived Kocuria and Micrococcus spp. as Sources of the New Thiazolyl Peptide Antibiotic Kocurin
Source: PubMed Central journal article supplement (PMC3705389; doi:10.3390/md11041071), 2013-03-28
Supplement: marinedrugs-11-01071-s001.pdf [file marinedrugs-11-01071-s001.pdf]

## Supplementary Information

**Table S1.** Taxonomic identification based on 16S rRNA gene sequence similarities and PCR detection of PKS and NRPS genes.

| Sponge Origin   | Taxonomic identification       | Strain Code | ID similarity | PKS-I | PKS-II | NRPS |
|-----------------|--------------------------------|-------------|---------------|-------|--------|------|
| Chesapeake Bay  | <i>Micrococcus yunnanensis</i> | F-262,511   | >99%          | -     | -      | -    |
| Fort Lauderdale | <i>Micrococcus yunnanensis</i> | F-276,237   | >99%          | -     | -      | -    |
|                 |                                | F-276,281   | >99%          | -     | +      | -    |
| Florida Keys    | <i>Kocuria flava</i>           | F-276,744   | >98%          | -     | +      | +    |
|                 | <i>Kocuria marina</i>          | F-276,305   | >98%          | -     | -      | -    |
|                 |                                | F-276,308   | >96%          | -     | +      | -    |
|                 |                                | F-276,310   | >98%          | -     | -      | -    |
|                 |                                | F-276,951   | >98%          | -     | +      | -    |
|                 | <i>Kocuria palustris</i>       | F-275,534   | >99%          | +     | +      | -    |
|                 |                                | F-275,537   | >97%          | +     | +      | -    |
|                 |                                | F-275,550   | >98%          | +     | +      | -    |
|                 |                                | F-275,564   | >99%          | -     | +      | -    |
|                 |                                | F-276,246   | >98%          | -     | -      | -    |
|                 |                                | F-276,332   | >99%          | -     | +      | -    |
|                 |                                | F-276,345   | >97%          | -     | -      | +    |
|                 |                                | F-276,377   | >99%          | -     | +      | +    |
|                 |                                | F-276,687   | >97%          | +     | +      | -    |
|                 |                                | F-276,737   | >97%          | -     | +      | +    |
|                 |                                | F-276,957   | >97%          | +     | +      | -    |
|                 | <i>Kocuria rhizophila</i>      | F-275,037   | 100%          | +     | -      | +    |
|                 |                                | F-275,531   | >97%          | +     | -      | -    |
|                 |                                | F-275,565   | >98%          | -     | +      | -    |
|                 | <i>Kocuria rosea</i>           | F-276,384   | >96%          | -     | +      | +    |
|                 | <i>Kocuria sediminis</i>       | F-275,480   | >98%          | -     | -      | -    |
|                 |                                | F-276,716   | >97%          | -     | +      | +    |

Table S1. Cont.

|                                |           |      |   |   |   |
|--------------------------------|-----------|------|---|---|---|
| <i>Kocuria turfanensis</i>     | F-270,523 | >99% | - | + | + |
|                                | F-274,998 | >98% | - | + | + |
|                                | F-275,015 | >98% | - | + | + |
|                                | F-275,022 | >98% | - | + | + |
|                                | F-275,029 | >99% | - | + | + |
|                                | F-276,758 | >97% | - | + | + |
|                                | F-276,883 | >98% | - | - | + |
| <i>Micrococcus yunnanensis</i> | F-256,446 | 100% | - | + | - |
|                                | F-270,487 | >99% | - | - | - |
|                                | F-270,502 | >99% | - | - | - |
|                                | F-270,531 | >99% | + | + | + |
|                                | F-275,023 | >99% | - | + | - |
|                                | F-275,490 | >99% | - | + | - |
|                                | F-275,503 | >99% | + | + | - |
|                                | F-276,253 | >99% | - | - | - |
|                                | F-276,380 | >99% | - | - | + |
|                                | F-276,701 | >99% | - | + | - |
| F-276,757                      | >97%      | -    | - | - |   |
| F-276,961                      | >97%      | -    | + | - |   |

+, positive detection of a PCR amplification product of the expected band size; -, no amplification product. Taxonomic identification and ID similarity: best match and similarity according to the EzTaxon server result.

**Table S2.** FAMES composition of *Micrococcaceae*.

| ID        | Taxonomy                       | anteiso-C13:0 | iso-C14:0 | 14::0 | iso-C15:0 | anteiso-C15:0 | iso-16:0 | C16::0 | anteiso-C17:1 ω9c | iso-C17:0 | anteiso-C17:0 |
|-----------|--------------------------------|---------------|-----------|-------|-----------|---------------|----------|--------|-------------------|-----------|---------------|
| F-262,511 | <i>Micrococcus yunnanensis</i> | 1.07          | 4.48      | 1.78  | 20.52     | 63.69         | 3.59     | 0.82   | 0.00              | 0.00      | 1.85          |
| F-276,237 | <i>Micrococcus yunnanensis</i> | 2.09          | 1.90      | 0.69  | 23.38     | 66.85         | 2.14     | 1.01   | 0.00              | 0.00      | 1.10          |
| F-276,281 | <i>Micrococcus yunnanensis</i> | 1.16          | 2.49      | 4.05  | 24.76     | 49.14         | 3.86     | 4.12   | 0.00              | 0.85      | 4.45          |
| F-276,744 | <i>Kocuria flava</i>           | 0.48          | 2.99      | 2.02  | 14.78     | 63.21         | 2.70     | 2.06   | 1.45              | 0.95      | 3.71          |
| F-276,305 | <i>Kocuria marina</i>          | 0.37          | 1.65      | 0.87  | 2.01      | 76.79         | 7.07     | 0.96   | 0.00              | 0.21      | 8.47          |
| F-276,308 | <i>Kocuria marina</i>          | 0.00          | 0.87      | 0.41  | 2.66      | 35.62         | 19.42    | 10.59  | 0.00              | 1.63      | 28.81         |
| F-276,310 | <i>Kocuria marina</i>          | 0.00          | 2.65      | 0.47  | 15.81     | 36.92         | 3.12     | 3.21   | 0.00              | 2.62      | 13.15         |
| F-276,951 | <i>Kocuria marina</i>          | 4.70          | 1.86      | 0.66  | 20.19     | 63.87         | 0.59     | 0.55   | 0.00              | 0.14      | 1.04          |
| F-275,534 | <i>Kocuria palustris</i>       | 0.79          | 1.92      | 1.59  | 1.48      | 79.98         | 0.81     | 0.00   | 0.00              | 0.00      | 4.12          |
| F-275,537 | <i>Kocuria palustris</i>       | 0.97          | 1.56      | 0.54  | 1.12      | 84.80         | 0.68     | 0.00   | 0.00              | 0.00      | 3.41          |
| F-275,550 | <i>Kocuria palustris</i>       | 0.00          | 1.95      | 4.20  | 2.29      | 66.58         | 1.39     | 1.58   | 0.00              | 0.00      | 9.51          |
| F-276,246 | <i>Kocuria palustris</i>       | 0.39          | 1.47      | 0.79  | 1.90      | 80.33         | 5.46     | 0.89   | 0.00              | 0.00      | 8.23          |
| F-276,332 | <i>Kocuria palustris</i>       | 0.51          | 3.13      | 2.23  | 2.14      | 77.07         | 2.15     | 0.94   | 0.00              | 0.00      | 8.13          |
| F-276,345 | <i>Kocuria palustris</i>       | 0.51          | 3.92      | 2.75  | 16.34     | 52.24         | 4.96     | 5.43   | 0.58              | 1.86      | 4.94          |
| F-276,687 | <i>Kocuria palustris</i>       | 0.11          | 1.56      | 6.87  | 7.03      | 61.03         | 6.18     | 8.90   | 0.00              | 0.25      | 7.69          |
| F-276,957 | <i>Kocuria palustris</i>       | 0.95          | 1.29      | 0.88  | 1.40      | 76.01         | 0.57     | 1.84   | 0.00              | 0.00      | 5.28          |
| F-275,037 | <i>Kocuria rhizophila</i>      | 0.45          | 1.46      | 2.51  | 20.91     | 42.77         | 7.00     | 2.99   | 0.00              | 2.09      | 18.43         |
| F-275,531 | <i>Kocuria rhizophila</i>      | 0.62          | 1.33      | 1.31  | 24.06     | 43.94         | 7.29     | 1.46   | 0.00              | 1.71      | 16.82         |
| F-275,565 | <i>Kocuria rhizophila</i>      | 0.71          | 1.83      | 5.17  | 15.80     | 43.45         | 7.39     | 4.92   | 0.00              | 1.40      | 18.07         |
| F-276,384 | <i>Kocuria rosea</i>           | 0.38          | 2.13      | 2.12  | 18.23     | 59.43         | 2.42     | 2.28   | 1.27              | 1.72      | 3.72          |
| F-275,480 | <i>Kocuria sediminis</i>       | 0.48          | 2.89      | 2.48  | 9.93      | 61.28         | 4.23     | 4.16   | 1.34              | 1.27      | 6.29          |
| F-276,716 | <i>Kocuria sediminis</i>       | 0.00          | 2.73      | 3.86  | 10.78     | 55.43         | 4.21     | 11.85  | 0.00              | 1.71      | 5.59          |
| F-270,523 | <i>Kocuria turfanensis</i>     | 0.31          | 1.98      | 1.59  | 16.15     | 56.74         | 2.52     | 1.32   | 2.79              | 1.48      | 3.94          |

Table S2. Cont.

|           |                                |      |      |      |       |       |      |      |      |      |       |
|-----------|--------------------------------|------|------|------|-------|-------|------|------|------|------|-------|
| F-274,998 | <i>Kocuria turfanensis</i>     | 0.43 | 2.00 | 1.54 | 14.47 | 57.82 | 2.76 | 1.50 | 3.07 | 1.36 | 4.26  |
| F-275,015 | <i>Kocuria turfanensis</i>     | 0.34 | 1.80 | 1.31 | 20.75 | 53.08 | 1.97 | 1.02 | 2.78 | 1.58 | 3.02  |
| F-275,022 | <i>Kocuria turfanensis</i>     | 0.23 | 2.07 | 1.35 | 23.39 | 47.92 | 1.65 | 0.75 | 2.40 | 1.28 | 1.96  |
| F-275,029 | <i>Kocuria turfanensis</i>     | 0.63 | 2.40 | 2.11 | 7.28  | 59.18 | 5.34 | 5.21 | 1.76 | 1.22 | 8.26  |
| F-276,758 | <i>Kocuria turfanensis</i>     | 0.43 | 1.96 | 1.88 | 13.79 | 62.63 | 1.89 | 1.06 | 2.39 | 0.89 | 3.11  |
| F-276,883 | <i>Kocuria turfanensis</i>     | 0.47 | 1.92 | 1.74 | 14.63 | 50.39 | 4.71 | 4.89 | 1.21 | 2.82 | 7.26  |
| F-256,446 | <i>Micrococcus yunnanensis</i> | 2.38 | 2.21 | 0.37 | 12.73 | 77.73 | 1.26 | 0.23 | 0.00 | 0.00 | 1.23  |
| F-270,487 | <i>Micrococcus yunnanensis</i> | 1.31 | 2.75 | 0.93 | 17.06 | 63.39 | 4.36 | 0.98 | 0.42 | 0.27 | 3.38  |
| F-270,502 | <i>Micrococcus yunnanensis</i> | 2.97 | 2.84 | 0.36 | 14.69 | 72.51 | 2.06 | 0.25 | 0.34 | 0.17 | 1.43  |
| F-275,023 | <i>Micrococcus yunnanensis</i> | 2.09 | 3.08 | 1.06 | 14.65 | 72.54 | 1.59 | 0.24 | 0.00 | 0.00 | 2.27  |
| F-275,490 | <i>Micrococcus yunnanensis</i> | 1.94 | 5.16 | 3.67 | 25.13 | 53.63 | 3.25 | 1.73 | 0.00 | 0.00 | 1.19  |
| F-275,503 | <i>Micrococcus yunnanensis</i> | 3.24 | 4.48 | 2.13 | 27.57 | 54.72 | 1.21 | 0.73 | 0.00 | 0.00 | 0.53  |
| F-276,253 | <i>Micrococcus yunnanensis</i> | 3.56 | 3.57 | 0.54 | 20.06 | 65.41 | 0.60 | 0.38 | 0.16 | 0.00 | 0.26  |
| F-276,701 | <i>Micrococcus yunnanensis</i> | 2.82 | 3.41 | 1.73 | 18.36 | 65.43 | 1.50 | 0.46 | 0.16 | 0.00 | 1.10  |
| F-276,757 | <i>Micrococcus yunnanensis</i> | 1.68 | 2.85 | 4.10 | 33.96 | 44.47 | 1.49 | 1.33 | 0.39 | 0.31 | 0.91  |
| F-276,961 | <i>Micrococcus yunnanensis</i> | 1.89 | 3.76 | 1.72 | 28.87 | 56.82 | 1.68 | 0.96 | 0.00 | 0.00 | 1.01  |
| F-278,500 | <i>Arthrobacter flavus</i>     | 0.00 | 1.71 | 0.94 | 8.76  | 33.69 | 8.43 | 7.72 | 5.39 | 2.23 | 18.45 |
| F-278,499 | <i>Arthrobacter flavus</i>     | 0.00 | 0.34 | 1.21 | 13.00 | 48.89 | 1.92 | 4.46 | 6.19 | 1.85 | 11.70 |
