# Supplementary material for: Sponge-Derived Kocuria and Micrococcus spp. as Sources of the New Thiazolyl Peptide Antibiotic Kocurin
Source: MDPI journal article supplement (doi:10.3390/md11041071), 2013-03-28
Supplement: s2 [file s2]

marinedrugs-11-01071-s001.mol
  corina  04151404323D 1   1.00000     0.00000 
CORINA 3.49 0023  12.04.2013
105116  0  0  0  0  0  0  0  0999 V2000
    0.9392    1.3267    1.4869 C   0  0  0  0  0  0  0  0  0  0  0  0
   -0.2654    1.3156    2.1650 C   0  0  0  0  0  0  0  0  0  0  0  0
    1.8162    0.2664    1.6185 C   0  0  0  0  0  0  0  0  0  0  0  0
    1.4887   -0.8051    2.4281 C   0  0  0  0  0  0  0  0  0  0  0  0
    0.2843   -0.8160    3.1065 C   0  0  0  0  0  0  0  0  0  0  0  0
   -0.5929    0.2441    2.9746 C   0  0  0  0  0  0  0  0  0  0  0  0
   -1.2213    2.4719    2.0219 C   0  0  0  0  0  0  0  0  0  0  0  0
   -1.8128    2.4730    0.6109 C   0  0  0  0  0  0  0  0  0  0  0  0
   -2.6952    1.2649    0.4652 C   0  0  0  0  0  0  0  0  0  0  0  0
   -3.8679    1.2147   -0.0191 N   0  0  0  0  0  0  0  0  0  0  0  0
   -2.1915   -0.3599    0.9837 S   0  0  0  0  0  0  0  0  0  0  0  0
   -3.7421   -1.1867    0.5068 C   0  0  0  0  0  0  0  0  0  0  0  0
   -4.5784   -0.0387   -0.0924 C   0  0  0  0  0  0  0  0  0  0  0  0
   -2.4833    3.7540    0.3924 N   0  0  0  0  0  0  0  0  0  0  0  0
   -2.1170    6.2555    0.3089 C   0  0  0  0  0  0  0  0  0  0  0  0
   -1.7334    4.8545    0.4473 C   0  0  0  0  0  0  0  0  0  0  0  0
   -0.5486    4.6616    0.6432 O   0  0  0  0  0  0  0  0  0  0  0  0
   -1.1756    7.2285    0.5191 C   0  0  0  0  0  0  0  0  0  0  0  0
   -1.8922    8.7498    0.2484 S   0  0  0  0  0  0  0  0  0  0  0  0
   -3.3763    8.0182   -0.1879 C   0  0  0  0  0  0  0  0  0  0  0  0
   -3.3066    6.7491   -0.0366 N   0  0  0  0  0  0  0  0  0  0  0  0
   -4.5360    8.8136   -0.7369 C   0  0  0  0  0  0  0  0  0  0  0  0
   -6.5350    9.8790   -1.2505 O   0  0  0  0  0  0  0  0  0  0  0  0
   -6.8670    9.1323   -0.3499 C   0  0  0  0  0  0  0  0  0  0  0  0
   -5.8293    8.3459   -0.1378 N   0  0  0  0  0  0  0  0  0  0  0  0
   -4.3334   10.2937   -0.4067 C   0  0  0  0  0  0  0  0  0  0  0  0
   -4.4093   10.4905    1.0855 C   0  0  0  0  0  0  0  0  0  0  0  0
   -4.1470   11.6996    1.6200 N   0  0  0  0  0  0  0  0  0  0  0  0
   -4.7065    9.5608    1.8054 O   0  0  0  0  0  0  0  0  0  0  0  0
   -8.2065    9.5113   -0.0061 C   0  0  0  0  0  0  0  0  0  0  0  0
   -8.5299   10.7346    0.5310 C   0  0  0  0  0  0  0  0  0  0  0  0
   -9.8562   10.7930    0.6407 O   0  0  0  0  0  0  0  0  0  0  0  0
  -10.3612    9.6656    0.0711 C   0  0  0  0  0  0  0  0  0  0  0  0
   -9.3777    8.8541   -0.1868 N   0  0  0  0  0  0  0  0  0  0  0  0
  -12.6058    6.0546   -0.2638 N   0  0  0  0  0  0  0  0  0  0  0  0
  -12.6618    7.2514    0.2857 C   0  0  0  0  0  0  0  0  0  0  0  0
  -12.6922    8.5530   -0.4031 C   0  0  0  0  0  0  0  0  0  0  0  0
  -11.7828    9.6117   -0.3549 C   0  0  0  0  0  0  0  0  0  0  0  0
  -12.8917    5.0338    0.4781 C   0  0  0  0  0  0  0  0  0  0  0  0
  -13.1248    5.5858    2.1465 S   0  0  0  0  0  0  0  0  0  0  0  0
  -12.9069    7.2514    1.6301 C   0  0  0  0  0  0  0  0  0  0  0  0
  -13.0692    3.6150    0.0995 C   0  0  0  0  0  0  0  0  0  0  0  0
  -14.1519    2.9224    0.5462 C   0  0  0  0  0  0  0  0  0  0  0  0
  -14.0274    1.2714   -0.0469 S   0  0  0  0  0  0  0  0  0  0  0  0
  -12.5181    1.6288   -0.7564 C   0  0  0  0  0  0  0  0  0  0  0  0
  -12.2254    2.8749   -0.6052 N   0  0  0  0  0  0  0  0  0  0  0  0
  -11.6220    0.6220   -1.4236 C   0  0  0  0  0  0  0  0  0  0  0  0
  -10.5768    0.1893   -0.4959 N   0  0  0  0  0  0  0  0  0  0  0  0
  -10.9741   -1.0799    0.1165 C   0  0  0  0  0  0  0  0  0  0  0  0
  -12.1344   -1.6521   -0.7013 C   0  0  0  0  0  0  0  0  0  0  0  0
  -12.4377   -0.6271   -1.8099 C   0  0  0  0  0  0  0  0  0  0  0  0
   -9.3851    0.7865   -0.3197 C   0  0  0  0  0  0  0  0  0  0  0  0
   -8.3244    0.2076    0.5747 C   0  0  0  0  0  0  0  0  0  0  0  0
   -7.0344    0.1997   -0.1416 N   0  0  0  0  0  0  0  0  0  0  0  0
   -5.9088    0.0198    0.6064 C   0  0  0  0  0  0  0  0  0  0  0  0
   -5.9791   -0.0913    1.8120 O   0  0  0  0  0  0  0  0  0  0  0  0
   -9.1582    1.8261   -0.9017 O   0  0  0  0  0  0  0  0  0  0  0  0
   -8.2014    1.0600    1.8392 C   0  0  0  0  0  0  0  0  0  0  0  0
   -9.5347    1.1151    2.5395 C   0  0  0  0  0  0  0  0  0  0  0  0
   -9.8295    0.2023    3.5353 C   0  0  0  0  0  0  0  0  0  0  0  0
  -10.4588    2.0821    2.1891 C   0  0  0  0  0  0  0  0  0  0  0  0
  -11.6815    2.1351    2.8299 C   0  0  0  0  0  0  0  0  0  0  0  0
  -11.9818    1.2170    3.8257 C   0  0  0  0  0  0  0  0  0  0  0  0
  -11.0510    0.2507    4.1787 C   0  0  0  0  0  0  0  0  0  0  0  0
  -13.1838    1.2673    4.4578 O   0  0  0  0  0  0  0  0  0  0  0  0
   -7.5577   11.8164    0.9253 C   0  0  0  0  0  0  0  0  0  0  0  0
  -13.8380    8.7146   -1.1024 N   0  0  0  0  0  0  0  0  0  0  0  0
  -14.2382    9.8581   -1.6259 C   0  0  0  0  0  0  0  0  0  0  0  0
  -13.4562   11.0031   -1.4539 C   0  0  0  0  0  0  0  0  0  0  0  0
  -12.2334   10.8805   -0.8384 C   0  0  0  0  0  0  0  0  0  0  0  0
  -15.5029    9.9268   -2.3877 C   0  0  0  0  0  0  0  0  0  0  0  0
  -16.3011    8.9264   -2.6058 N   0  0  0  0  0  0  0  0  0  0  0  0
  -17.3875    9.1956   -3.3132 C   0  0  0  0  0  0  0  0  0  0  0  0
  -17.5066   10.4947   -3.7104 C   0  0  0  0  0  0  0  0  0  0  0  0
  -16.1618   11.3788   -3.1322 S   0  0  0  0  0  0  0  0  0  0  0  0
  -18.3911    8.1696   -3.6462 C   0  0  0  0  0  0  0  0  0  0  0  0
  -18.2216    6.9000   -3.2267 N   0  0  0  0  0  0  0  0  0  0  0  0
  -19.1194    5.9037   -3.6298 C   0  0  0  0  0  0  0  0  0  0  0  0
  -19.3185    5.6269   -5.0654 C   0  0  0  0  0  0  0  0  0  0  0  0
  -20.1825    4.6680   -5.4533 N   0  0  0  0  0  0  0  0  0  0  0  0
  -20.3801    4.3931   -6.8787 C   0  0  0  0  0  0  0  0  0  0  0  0
  -21.7433    3.7861   -7.0889 C   0  0  0  0  0  0  0  0  0  0  0  0
  -22.1466    3.4486   -8.3298 N   0  0  0  0  0  0  0  0  0  0  0  0
  -21.3592    3.6170   -9.5647 C   0  0  0  0  0  0  0  0  0  0  0  0
  -22.4114    3.6875  -10.6995 C   0  0  0  0  0  0  0  0  0  0  0  0
  -23.4688    2.6641  -10.2078 C   0  0  0  0  0  0  0  0  0  0  0  0
  -23.4422    2.8456   -8.6754 C   0  0  0  0  0  0  0  0  0  0  0  0
  -23.5895    1.5074   -7.9981 C   0  0  0  0  0  0  0  0  0  0  0  0
  -24.7043    0.7744   -8.1894 N   0  0  0  0  0  0  0  0  0  0  0  0
  -22.7049    1.0901   -7.2809 O   0  0  0  0  0  0  0  0  0  0  0  0
  -24.8861   -0.4215   -7.4827 C   0  0  0  0  0  0  0  0  0  0  0  0
  -23.8871   -1.5014   -7.5912 C   0  0  0  0  0  0  0  0  0  0  0  0
  -24.0620   -2.6520   -6.9113 N   0  0  0  0  0  0  0  0  0  0  0  0
  -25.9636   -0.5838   -6.7109 C   0  0  0  0  0  0  0  0  0  0  0  0
  -22.9058   -1.3536   -8.2940 O   0  0  0  0  0  0  0  0  0  0  0  0
  -23.0656   -3.6353   -6.9314 C   0  0  0  0  0  0  0  0  0  0  0  0
  -22.6348   -4.2231   -8.2144 C   0  0  0  0  0  0  0  0  0  0  0  0
  -21.6757   -5.1698   -8.2337 N   0  0  0  0  0  0  0  0  0  0  0  0
  -22.5051   -4.0413   -5.7893 C   0  0  0  0  0  0  0  0  0  0  0  0
  -23.1452   -3.8535   -9.2543 O   0  0  0  0  0  0  0  0  0  0  0  0
  -19.3725    8.4683   -4.2997 O   0  0  0  0  0  0  0  0  0  0  0  0
  -19.7953    5.2042   -2.7150 C   0  0  0  0  0  0  0  0  0  0  0  0
  -22.4775    3.6012   -6.1414 O   0  0  0  0  0  0  0  0  0  0  0  0
  -19.3067    3.4166   -7.3634 C   0  0  0  0  0  0  0  0  0  0  0  0
  -18.7030    6.2638   -5.8984 O   0  0  0  0  0  0  0  0  0  0  0  0
  1  2  1  0      
  1  3  2  0      
  3  4  1  0      
  4  5  2  0      
  5  6  1  0      
  6  2  2  0      
  2  7  1  0      
  8  7  1  0      
  8  9  1  0      
  9 10  2  0      
  9 11  1  0      
 11 12  1  0      
 13 10  1  0      
 14  8  1  0      
 15 16  1  0      
 16 14  1  0      
 16 17  2  0      
 15 18  2  0      
 18 19  1  0      
 19 20  1  0      
 20 21  2  0      
 21 15  1  0      
 20 22  1  0      
 23 24  2  0      
 24 25  1  0      
 25 22  1  0      
 22 26  1  0      
 26 27  1  0      
 27 28  1  0      
 27 29  2  0      
 24 30  1  0      
 30 31  2  0      
 31 32  1  0      
 32 33  1  0      
 33 34  2  0      
 34 30  1  0      
 35 36  1  0      
 36 37  1  0      
 37 38  1  0      
 38 33  1  0      
 35 39  2  0      
 39 40  1  0      
 40 41  1  0      
 41 36  2  0      
 39 42  1  0      
 42 43  2  0      
 43 44  1  0      
 44 45  1  0      
 45 46  2  0      
 46 42  1  0      
 47 45  1  0      
 47 48  1  0      
 48 49  1  0      
 49 50  1  0      
 50 51  1  0      
 51 47  1  0      
 48 52  1  0      
 52 53  1  0      
 53 54  1  0      
 13 55  1  0      
 54 55  1  0      
 55 56  2  0      
 52 57  2  0      
 53 58  1  0      
 58 59  1  0      
 59 60  1  0      
 59 61  2  0      
 61 62  1  0      
 62 63  2  0      
 63 64  1  0      
 64 60  2  0      
 63 65  1  0      
 31 66  1  0      
 13 12  1  0      
 37 67  2  0      
 67 68  1  0      
 68 69  2  0      
 69 70  1  0      
 70 38  2  0      
 68 71  1  0      
 71 72  2  0      
 72 73  1  0      
 73 74  2  0      
 74 75  1  0      
 75 71  1  0      
 73 76  1  0      
 76 77  1  0      
 77 78  1  0      
 78 79  1  0      
 79 80  1  0      
 80 81  1  0      
 81 82  1  0      
 82 83  1  0      
 83 84  1  0      
 84 85  1  0      
 85 86  1  0      
 86 87  1  0      
 87 83  1  0      
 87 88  1  0      
 88 89  1  0      
 88 90  2  0      
 89 91  1  0      
 91 92  1  0      
 92 93  1  0      
 91 94  2  0      
 92 95  2  0      
 93 96  1  0      
 96 97  1  0      
 97 98  1  0      
 96 99  2  0      
 97100  2  0      
 76101  2  0      
 78102  2  0      
 82103  2  0      
 81104  1  0      
 79105  2  0      
M  END
$$$$
