# Supplementary material for: Sponge-Derived Kocuria and Micrococcus spp. as Sources of the New Thiazolyl Peptide Antibiotic Kocurin
Source: MDPI journal article supplement (doi:10.3390/md11041071), 2013-03-28
Supplement: s3 [file s3]

marinedrugs-11-01071-s001.mol
  ChemDraw03101420492D

105116  0  0  0  0  0  0  0  0999 V2000
   -9.0802   -6.4353    0.0000 C   0  0  0  0  0  0  0  0  0  0  0  0
   -8.2552   -6.4353    0.0000 C   0  0  0  0  0  0  0  0  0  0  0  0
   -9.4927   -7.1498    0.0000 C   0  0  0  0  0  0  0  0  0  0  0  0
   -9.0802   -7.8643    0.0000 C   0  0  0  0  0  0  0  0  0  0  0  0
   -8.2552   -7.8643    0.0000 C   0  0  0  0  0  0  0  0  0  0  0  0
   -7.8427   -7.1498    0.0000 C   0  0  0  0  0  0  0  0  0  0  0  0
   -7.8427   -5.7208    0.0000 C   0  0  0  0  0  0  0  0  0  0  0  0
   -7.2240   -5.7134    0.0000 C   0  0  0  0  0  0  0  0  0  0  0  0
   -6.8115   -6.4279    0.0000 C   0  0  0  0  0  0  0  0  0  0  0  0
   -5.9865   -6.4279    0.0000 N   0  0  0  0  0  0  0  0  0  0  0  0
   -7.0664   -7.2125    0.0000 S   0  0  0  0  0  0  0  0  0  0  0  0
   -6.3990   -7.6975    0.0000 C   0  0  0  0  0  0  0  0  0  0  0  0
   -5.7315   -7.2125    0.0000 C   0  0  0  0  0  0  0  0  0  0  0  0
   -6.8115   -4.9990    0.0000 N   0  0  0  0  0  0  0  0  0  0  0  0
   -6.8115   -3.5700    0.0000 C   0  0  0  0  0  0  0  0  0  0  0  0
   -7.2240   -4.2845    0.0000 C   0  0  0  0  0  0  0  0  0  0  0  0
   -8.0490   -4.2845    0.0000 O   0  0  0  0  0  0  0  0  0  0  0  0
   -5.9659   -3.3003    0.0000 C   0  0  0  0  0  0  0  0  0  0  0  0
   -5.9714   -2.5326    0.0000 S   0  0  0  0  0  0  0  0  0  0  0  0
   -6.7416   -2.2370    0.0000 C   0  0  0  0  0  0  0  0  0  0  0  0
   -7.2608   -2.8781    0.0000 N   0  0  0  0  0  0  0  0  0  0  0  0
   -6.9551   -1.4401    0.0000 C   0  0  0  0  0  0  0  0  0  0  0  0
   -5.9178   -2.2802    0.0000 O   0  0  0  0  0  0  0  0  0  0  0  0
   -5.6221   -1.5100    0.0000 C   0  0  0  0  0  0  0  0  0  0  0  0
   -6.2632   -0.9908    0.0000 N   0  0  0  0  0  0  0  0  0  0  0  0
   -7.6696   -1.0276    0.0000 C   0  0  0  0  0  0  0  0  0  0  0  0
   -8.3841   -1.4401    0.0000 C   0  0  0  0  0  0  0  0  0  0  0  0
   -9.0986   -1.0276    0.0000 N   0  0  0  0  0  0  0  0  0  0  0  0
   -8.3841   -2.2651    0.0000 O   0  0  0  0  0  0  0  0  0  0  0  0
   -4.7971   -1.5100    0.0000 C   0  0  0  0  0  0  0  0  0  0  0  0
   -3.9446   -1.8978    0.0000 C   0  0  0  0  0  0  0  0  0  0  0  0
   -3.3465   -1.2997    0.0000 O   0  0  0  0  0  0  0  0  0  0  0  0
   -3.8051   -0.6167    0.0000 C   0  0  0  0  0  0  0  0  0  0  0  0
   -4.6256   -0.7030    0.0000 N   0  0  0  0  0  0  0  0  0  0  0  0
   -2.4802   -1.2997    0.0000 N   0  0  0  0  0  0  0  0  0  0  0  0
   -2.0471   -0.5984    0.0000 C   0  0  0  0  0  0  0  0  0  0  0  0
   -2.5009    0.0409    0.0000 C   0  0  0  0  0  0  0  0  0  0  0  0
   -3.3202    0.0507    0.0000 C   0  0  0  0  0  0  0  0  0  0  0  0
   -1.9471   -1.9283    0.0000 C   0  0  0  0  0  0  0  0  0  0  0  0
   -1.1846   -1.6156    0.0000 S   0  0  0  0  0  0  0  0  0  0  0  0
   -1.2463   -0.7937    0.0000 C   0  0  0  0  0  0  0  0  0  0  0  0
   -2.1607   -2.7252    0.0000 C   0  0  0  0  0  0  0  0  0  0  0  0
   -2.8751   -3.1377    0.0000 C   0  0  0  0  0  0  0  0  0  0  0  0
   -2.7036   -3.9447    0.0000 S   0  0  0  0  0  0  0  0  0  0  0  0
   -1.8831   -4.0309    0.0000 C   0  0  0  0  0  0  0  0  0  0  0  0
   -1.5476   -3.2772    0.0000 N   0  0  0  0  0  0  0  0  0  0  0  0
   -1.5315   -4.5791    0.0000 C   0  0  0  0  0  0  0  0  0  0  0  0
   -1.8314   -5.3476    0.0000 N   0  0  0  0  0  0  0  0  0  0  0  0
   -1.1932   -5.8704    0.0000 C   0  0  0  0  0  0  0  0  0  0  0  0
   -0.4988   -5.4249    0.0000 C   0  0  0  0  0  0  0  0  0  0  0  0
   -0.7079   -4.6268    0.0000 C   0  0  0  0  0  0  0  0  0  0  0  0
   -2.7690   -5.3422    0.0000 C   0  0  0  0  0  0  0  0  0  0  0  0
   -3.1609   -6.4353    0.0000 C   0  0  0  0  0  0  0  0  0  0  0  0
   -4.4190   -6.4353    0.0000 N   0  0  0  0  0  0  0  0  0  0  0  0
   -4.9065   -7.2125    0.0000 C   0  0  0  0  0  0  0  0  0  0  0  0
   -4.4940   -7.9270    0.0000 O   0  0  0  0  0  0  0  0  0  0  0  0
   -3.1815   -4.6277    0.0000 O   0  0  0  0  0  0  0  0  0  0  0  0
   -2.7484   -7.1498    0.0000 C   0  0  0  0  0  0  0  0  0  0  0  0
   -1.9234   -7.1498    0.0000 C   0  0  0  0  0  0  0  0  0  0  0  0
   -1.5109   -6.4353    0.0000 C   0  0  0  0  0  0  0  0  0  0  0  0
   -1.5109   -7.8643    0.0000 C   0  0  0  0  0  0  0  0  0  0  0  0
   -0.6859   -7.8643    0.0000 C   0  0  0  0  0  0  0  0  0  0  0  0
   -0.2734   -7.1498    0.0000 C   0  0  0  0  0  0  0  0  0  0  0  0
   -0.6859   -6.4353    0.0000 C   0  0  0  0  0  0  0  0  0  0  0  0
    0.5516   -7.1498    0.0000 O   0  0  0  0  0  0  0  0  0  0  0  0
   -3.9446   -2.7228    0.0000 C   0  0  0  0  0  0  0  0  0  0  0  0
   -2.0827    0.7456    0.0000 N   0  0  0  0  0  0  0  0  0  0  0  0
   -2.5009    1.4600    0.0000 C   0  0  0  0  0  0  0  0  0  0  0  0
   -3.3202    1.4600    0.0000 C   0  0  0  0  0  0  0  0  0  0  0  0
   -3.7383    0.7456    0.0000 C   0  0  0  0  0  0  0  0  0  0  0  0
   -2.0884    2.1745    0.0000 C   0  0  0  0  0  0  0  0  0  0  0  0
   -1.2915    2.3880    0.0000 N   0  0  0  0  0  0  0  0  0  0  0  0
   -1.2483    3.2119    0.0000 C   0  0  0  0  0  0  0  0  0  0  0  0
   -2.0185    3.5075    0.0000 C   0  0  0  0  0  0  0  0  0  0  0  0
   -2.5377    2.8664    0.0000 S   0  0  0  0  0  0  0  0  0  0  0  0
   -0.5338    3.6244    0.0000 C   0  0  0  0  0  0  0  0  0  0  0  0
    0.1807    3.2119    0.0000 N   0  0  0  0  0  0  0  0  0  0  0  0
    0.8951    3.6244    0.0000 C   0  0  0  0  0  0  0  0  0  0  0  0
    1.6096    3.2119    0.0000 C   0  0  0  0  0  0  0  0  0  0  0  0
    2.3241    3.6244    0.0000 N   0  0  0  0  0  0  0  0  0  0  0  0
    3.0385    3.2119    0.0000 C   0  0  0  0  0  0  0  0  0  0  0  0
    3.7530    3.6244    0.0000 C   0  0  0  0  0  0  0  0  0  0  0  0
    4.4675    3.2119    0.0000 N   0  0  0  0  0  0  0  0  0  0  0  0
    4.4675    2.3869    0.0000 C   0  0  0  0  0  0  0  0  0  0  0  0
    5.2521    2.1319    0.0000 C   0  0  0  0  0  0  0  0  0  0  0  0
    5.7370    2.7994    0.0000 C   0  0  0  0  0  0  0  0  0  0  0  0
    5.2521    3.4668    0.0000 C   0  0  0  0  0  0  0  0  0  0  0  0
    5.4656    4.2637    0.0000 C   0  0  0  0  0  0  0  0  0  0  0  0
    6.2625    4.4772    0.0000 N   0  0  0  0  0  0  0  0  0  0  0  0
    5.0531    4.9782    0.0000 O   0  0  0  0  0  0  0  0  0  0  0  0
    6.4760    5.2741    0.0000 C   0  0  0  0  0  0  0  0  0  0  0  0
    7.2729    5.4877    0.0000 C   0  0  0  0  0  0  0  0  0  0  0  0
    7.6854    6.2021    0.0000 N   0  0  0  0  0  0  0  0  0  0  0  0
    6.0635    5.9886    0.0000 C   0  0  0  0  0  0  0  0  0  0  0  0
    7.6854    4.7732    0.0000 O   0  0  0  0  0  0  0  0  0  0  0  0
    8.3980    6.3862    0.0000 C   0  0  0  0  0  0  0  0  0  0  0  0
    8.6958    7.2125    0.0000 C   0  0  0  0  0  0  0  0  0  0  0  0
    9.4927    7.4261    0.0000 N   0  0  0  0  0  0  0  0  0  0  0  0
    8.8775    5.7109    0.0000 C   0  0  0  0  0  0  0  0  0  0  0  0
    8.2833    7.9270    0.0000 O   0  0  0  0  0  0  0  0  0  0  0  0
   -0.3203    4.4213    0.0000 O   0  0  0  0  0  0  0  0  0  0  0  0
    1.1086    4.4213    0.0000 C   0  0  0  0  0  0  0  0  0  0  0  0
    3.9665    4.4213    0.0000 O   0  0  0  0  0  0  0  0  0  0  0  0
    2.8250    2.4150    0.0000 C   0  0  0  0  0  0  0  0  0  0  0  0
    1.3961    2.4150    0.0000 O   0  0  0  0  0  0  0  0  0  0  0  0
  1  2  1  0      
  1  3  2  0      
  3  4  1  0      
  4  5  2  0      
  5  6  1  0      
  6  2  2  0      
  2  7  1  0      
  8  7  1  6      
  8  9  1  0      
  9 10  2  0      
  9 11  1  0      
 11 12  1  0      
 13 10  1  0      
 14  8  1  0      
 15 16  1  0      
 16 14  1  0      
 16 17  2  0      
 15 18  2  0      
 18 19  1  0      
 19 20  1  0      
 20 21  2  0      
 21 15  1  0      
 20 22  1  0      
 23 24  2  0      
 24 25  1  0      
 25 22  1  0      
 22 26  1  6      
 26 27  1  0      
 27 28  1  0      
 27 29  2  0      
 24 30  1  0      
 30 31  2  0      
 31 32  1  0      
 32 33  1  0      
 33 34  2  0      
 34 30  1  0      
 35 36  1  0      
 36 37  1  0      
 37 38  1  0      
 38 33  1  0      
 35 39  2  0      
 39 40  1  0      
 40 41  1  0      
 41 36  2  0      
 39 42  1  0      
 42 43  2  0      
 43 44  1  0      
 44 45  1  0      
 45 46  2  0      
 46 42  1  0      
 47 45  1  6      
 47 48  1  0      
 48 49  1  0      
 49 50  1  0      
 50 51  1  0      
 51 47  1  0      
 48 52  1  0      
 52 53  1  0      
 53 54  1  0      
 13 55  1  0      
 54 55  1  0      
 55 56  2  0      
 52 57  2  0      
 53 58  1  6      
 58 59  1  0      
 59 60  1  0      
 59 61  2  0      
 61 62  1  0      
 62 63  2  0      
 63 64  1  0      
 64 60  2  0      
 63 65  1  0      
 31 66  1  0      
 13 12  1  6      
 37 67  2  0      
 67 68  1  0      
 68 69  2  0      
 69 70  1  0      
 70 38  2  0      
 68 71  1  0      
 71 72  2  0      
 72 73  1  0      
 73 74  2  0      
 74 75  1  0      
 75 71  1  0      
 73 76  1  0      
 76 77  1  0      
 77 78  1  0      
 78 79  1  0      
 79 80  1  0      
 80 81  1  0      
 81 82  1  0      
 82 83  1  0      
 83 84  1  0      
 84 85  1  0      
 85 86  1  0      
 86 87  1  0      
 87 83  1  0      
 87 88  1  6      
 88 89  1  0      
 88 90  2  0      
 89 91  1  0      
 91 92  1  0      
 92 93  1  0      
 91 94  2  0      
 92 95  2  0      
 93 96  1  0      
 96 97  1  0      
 97 98  1  0      
 96 99  2  0      
 97100  2  0      
 76101  2  0      
 78102  2  0      
 82103  2  0      
 81104  1  6      
 79105  2  0      
M  END
